# Supplementary material for: Low-Density-Lipoprotein Particle Size Predicts a Poor Outcome in Patients with Atherothrombotic Stroke
Source: PubMed Central journal article supplement — J Clin Neurol. 2015 Jan 2;11(1):80–6. doi: 10.3988/jcn.2015.11.1.80 (PMC4302183; doi:10.3988/jcn.2015.11.1.80), 2015-01-02
Supplement: jcn-11-80-s001.pdf [file jcn-11-80-s001.pdf]

**Supplementary Table 1.** Comparison of demographic and clinical data according to degree of cerebral artery stenosis

| Characteristics                                       | Degree of stenosis           |                         |                        | Total      | p value |
|-------------------------------------------------------|------------------------------|-------------------------|------------------------|------------|---------|
|                                                       | No atherosclerosis,<br>n=136 | 0<stenosis<50%,<br>n=61 | ≥50% stenosis,<br>n=51 |            |         |
| Demographic data                                      |                              |                         |                        |            |         |
| Gender, male, n (%)                                   | 92 (67.6)                    | 37 (60.7)               | 32 (62.7)              | 161 (64.9) | 0.595   |
| Age, years, mean±SD                                   | 61±11                        | 63±14                   | 63±10                  | 62±11      | 0.405   |
| Risk factors, n (%)                                   |                              |                         |                        |            |         |
| Hypertension                                          | 56 (41.2)                    | 20 (32.8)               | 26 (51.0)              | 102 (41.1) | 0.150   |
| Diabetes mellitus                                     | 40 (29.4)                    | 14 (23.0)               | 23 (45.1)              | 77 (31.0)  | 0.034   |
| Hyperlipidemia                                        | 20 (14.7)                    | 7 (11.5)                | 11 (21.6)              | 38 (15.3)  | 0.322   |
| Smoking                                               | 32 (23.5)                    | 5 (8.2)                 | 11 (21.6)              | 48 (19.4)  | 0.038   |
| Familial history                                      | 3 (2.2)                      | 4 (6.6)                 | 4 (7.8)                | 11 (4.4)   | 0.162   |
| Coronary heart disease                                | 13 (9.6)                     | 10 (16.4)               | 10 (19.6)              | 33 (13.3)  | 0.141   |
| Medications, n (%)                                    |                              |                         |                        |            |         |
| Pre-stroke lipid lowering agents                      | 15 (11.0)                    | 4 (6.6)                 | 2 (3.9)                | 21 (8.5)   | 0.247   |
| Laboratory data, mean±SD                              |                              |                         |                        |            |         |
| LDL particle size, nm                                 | 25.9±0.8                     | 25.2±0.7                | 24.5±0.8               | 25.9±0.9   | 0.010   |
| Hemoglobin, g/L                                       | 13±2                         | 13±1                    | 12±2                   | 13±2       | 0.098   |
| White blood cell count, ×10 <sup>12</sup> /L          | 6±2                          | 7±2                     | 8±4                    | 7±3        | 0.104   |
| Total cholesterol, mg/dL                              | 177±34                       | 189±28                  | 181±37                 | 181±34     | 0.085   |
| High density lipoprotein, mg/dL                       | 44±11                        | 46±13                   | 42±11                  | 44±12      | 0.375   |
| Low density lipoprotein, mg/dL                        | 110±33                       | 119±29                  | 117±31                 | 114±31     | 0.142   |
| Lipoprotein (a), mg/dL                                | 21±18                        | 22±17                   | 29±24                  | 23±20      | 0.098   |
| Triglyceride, mg/dL                                   | 116±67                       | 120±59                  | 122±62                 | 118±64     | 0.497   |
| Hemoglobin A1C, %                                     | 6±1                          | 6±1                     | 7±2                    | 7±1        | 0.003   |
| High sensitivity C-reactive protein                   | 1±2                          | 1±2                     | 1±3                    | 1±2        | 0.123   |
| Fasting glucose, mg/dL                                | 104±32                       | 101±39                  | 126±51                 | 108±39     | 0.009   |
| TG/HDL ratio                                          | 2±2                          | 3±2                     | 3±2                    | 3±2        | 0.432   |
| Total cholesterol/HDL ratio                           | 4±1                          | 4±1                     | 4±2                    | 4±1        | 0.325   |
| LDL/HDL ratio                                         | 2±1                          | 2±1                     | 3±1                    | 3±1        | 0.108   |
| Clinical data                                         |                              |                         |                        |            |         |
| Body mass index, mean±SD                              | 24±2                         | 23±2                    | 23±2                   | 24±1       | 0.025   |
| Initial NIHSS score, median<br>(interquartile range)  | 3 (1–5)                      | 3 (1–5)                 | 3 (2–5)                | 3 (2–5)    | 0.782   |
| mRS score at 3 month, median<br>(interquartile range) | 3 (1–5)                      | 3 (1–5)                 | 3 (2–5)                | 3 (2–5)    | 0.003   |

The data are presented as n (%), mean±SD values or median (interquartile ranges).

HDL: high-density lipoprotein, LDL: low-density lipoprotein, mRS: modified Rankin scale, NIHSS: National Institute of Health Stroke Scale, n: number, SD: standard deviation, TG: triglyceride.
